# Supplementary material for: Flow and detailed 3D morphodynamic data from laboratory experiments of fluvial dike breaching
Source: PubMed Central journal article supplement (PMC6514018; doi:10.1038/s41597-019-0057-y), 2019-05-13
Supplement: 41597_2019_57_MOESM2_ESM.pdf [file 41597_2019_57_MOESM2_ESM.pdf]

```
1 HDF5 Test_1.h5
2
3 Group '/Experimental_configuration'
4
5 Dataset 'L_mc'
6 Size: 1
7 Datatype: H5T_IEEE_F64LE (double)
8
9 Dataset 'Q_i'
10 Size: 1
11 Datatype: H5T_IEEE_F64LE (double)
12
13 Dataset 'Rating_curve_of_Perf._plane_20'
14 Size: 133x2
15 Datatype: H5T_IEEE_F64LE (double)
16
17 Dataset 'Z_fp'
18 Size: 1
19 Datatype: H5T_IEEE_F64LE (double)
20
21 Dataset 'd_50'
22 Size: 1
23 Datatype: H5T_IEEE_F64LE (double)
24
25 Dataset 'l_mc'
26 Size: 1
27 Datatype: H5T_IEEE_F64LE (double)
28
29 Dataset 'z_bt'
30 Size: 1
31 Datatype: H5T_IEEE_F64LE (double)
32
33 Group '/Hydraulics'
34
35 Dataset 'Q_b'
36 Size: 339300
37 Datatype: H5T_IEEE_F64LE (double)
38
39 Dataset 'Q_d'
40 Size: 339300
41 Datatype: H5T_IEEE_F64LE (double)
42
43 Dataset 'Q_o'
44 Size: 339300
45 Datatype: H5T_IEEE_F64LE (double)
46
47 Dataset 't'
48 Size: 339300
49 Datatype: H5T_IEEE_F64LE (double)
50
51 Dataset 'z_G1'
52 Size: 339300
53 Datatype: H5T_IEEE_F64LE (double)
54
55 Dataset 'z_G2'
56 Size: 339300
57 Datatype: H5T_IEEE_F64LE (double)
58
59 Dataset 'z_G3'
60 Size: 339300
61 Datatype: H5T_IEEE_F64LE (double)
62
63 Dataset 'z_G4'
64 Size: 339300
65 Datatype: H5T_IEEE_F64LE (double)
66
67 Dataset 'z_G5'
68 Size: 339300
69 Datatype: H5T_IEEE_F64LE (double)
70
71 Group '/Reconstruction'
72
73 Dataset 't'
```

```
74         Size: 47
75         Datatype: H5T_IEEE_F64LE (double)
76
77     Dataset 'x'
78         Size: 305
79         Datatype: H5T_IEEE_F64LE (double)
80
81     Dataset 'y'
82         Size: 176
83         Datatype: H5T_IEEE_F64LE (double)
84
85     Dataset 'z'
86         Size: 176x305x47
87         Datatype: H5T_IEEE_F64LE (double)
88
89     Group '/Reconstruction_raw'
90
91     Dataset 'Point_cloud_xyz_(t=0s)'
92         Size: 97265x3
93         Datatype: H5T_IEEE_F64LE (double)
94
95     Dataset 'Point_cloud_xyz_(t=100s)'
96         Size: 21567x3
97         Datatype: H5T_IEEE_F64LE (double)
98
99     Dataset 'Point_cloud_xyz_(t=1020s)'
100        Size: 18456x3
101        Datatype: H5T_IEEE_F64LE (double)
102
103     Dataset 'Point_cloud_xyz_(t=110s)'
104        Size: 20384x3
105        Datatype: H5T_IEEE_F64LE (double)
106
107     Dataset 'Point_cloud_xyz_(t=120s)'
108        Size: 20627x3
109        Datatype: H5T_IEEE_F64LE (double)
110
111     Dataset 'Point_cloud_xyz_(t=12s)'
112        Size: 21210x3
113        Datatype: H5T_IEEE_F64LE (double)
114
115     Dataset 'Point_cloud_xyz_(t=1320s)'
116        Size: 19131x3
117        Datatype: H5T_IEEE_F64LE (double)
118
119     Dataset 'Point_cloud_xyz_(t=150s)'
120        Size: 20438x3
121        Datatype: H5T_IEEE_F64LE (double)
122
123     Dataset 'Point_cloud_xyz_(t=1620s)'
124        Size: 18357x3
125        Datatype: H5T_IEEE_F64LE (double)
126
127     Dataset 'Point_cloud_xyz_(t=16s)'
128        Size: 20464x3
129        Datatype: H5T_IEEE_F64LE (double)
130
131     Dataset 'Point_cloud_xyz_(t=180s)'
132        Size: 21433x3
133        Datatype: H5T_IEEE_F64LE (double)
134
135     Dataset 'Point_cloud_xyz_(t=1920s)'
136        Size: 17530x3
137        Datatype: H5T_IEEE_F64LE (double)
138
139     Dataset 'Point_cloud_xyz_(t=20s)'
140        Size: 21191x3
141        Datatype: H5T_IEEE_F64LE (double)
142
143     Dataset 'Point_cloud_xyz_(t=210s)'
144        Size: 20059x3
145        Datatype: H5T_IEEE_F64LE (double)
146
```

```
147 Dataset 'Point_cloud_xyz_(t=2220s) '  
148     Size: 18812x3  
149     Datatype: H5T_IEEE_F64LE (double)  
150  
151 Dataset 'Point_cloud_xyz_(t=23s) '  
152     Size: 21440x3  
153     Datatype: H5T_IEEE_F64LE (double)  
154  
155 Dataset 'Point_cloud_xyz_(t=240s) '  
156     Size: 20289x3  
157     Datatype: H5T_IEEE_F64LE (double)  
158  
159 Dataset 'Point_cloud_xyz_(t=2520s) '  
160     Size: 18932x3  
161     Datatype: H5T_IEEE_F64LE (double)  
162  
163 Dataset 'Point_cloud_xyz_(t=270s) '  
164     Size: 20443x3  
165     Datatype: H5T_IEEE_F64LE (double)  
166  
167 Dataset 'Point_cloud_xyz_(t=27s) '  
168     Size: 20515x3  
169     Datatype: H5T_IEEE_F64LE (double)  
170  
171 Dataset 'Point_cloud_xyz_(t=2820s) '  
172     Size: 17442x3  
173     Datatype: H5T_IEEE_F64LE (double)  
174  
175 Dataset 'Point_cloud_xyz_(t=2s) '  
176     Size: 21176x3  
177     Datatype: H5T_IEEE_F64LE (double)  
178  
179 Dataset 'Point_cloud_xyz_(t=300s) '  
180     Size: 20848x3  
181     Datatype: H5T_IEEE_F64LE (double)  
182  
183 Dataset 'Point_cloud_xyz_(t=30s) '  
184     Size: 21409x3  
185     Datatype: H5T_IEEE_F64LE (double)  
186  
187 Dataset 'Point_cloud_xyz_(t=3120s) '  
188     Size: 17743x3  
189     Datatype: H5T_IEEE_F64LE (double)  
190  
191 Dataset 'Point_cloud_xyz_(t=3350s) '  
192     Size: 315354x3  
193     Datatype: H5T_IEEE_F64LE (double)  
194  
195 Dataset 'Point_cloud_xyz_(t=34s) '  
196     Size: 20038x3  
197     Datatype: H5T_IEEE_F64LE (double)  
198  
199 Dataset 'Point_cloud_xyz_(t=360s) '  
200     Size: 19873x3  
201     Datatype: H5T_IEEE_F64LE (double)  
202  
203 Dataset 'Point_cloud_xyz_(t=37s) '  
204     Size: 21609x3  
205     Datatype: H5T_IEEE_F64LE (double)  
206  
207 Dataset 'Point_cloud_xyz_(t=41s) '  
208     Size: 20922x3  
209     Datatype: H5T_IEEE_F64LE (double)  
210  
211 Dataset 'Point_cloud_xyz_(t=420s) '  
212     Size: 20797x3  
213     Datatype: H5T_IEEE_F64LE (double)  
214  
215 Dataset 'Point_cloud_xyz_(t=45s) '  
216     Size: 21337x3  
217     Datatype: H5T_IEEE_F64LE (double)  
218  
219 Dataset 'Point_cloud_xyz_(t=480s) '
```

```
220         Size: 21163x3
221         Datatype: H5T_IEEE_F64LE (double)
222
223     Dataset 'Point_cloud_xyz_(t=48s) '
224         Size: 21307x3
225         Datatype: H5T_IEEE_F64LE (double)
226
227     Dataset 'Point_cloud_xyz_(t=52s) '
228         Size: 20757x3
229         Datatype: H5T_IEEE_F64LE (double)
230
231     Dataset 'Point_cloud_xyz_(t=540s) '
232         Size: 19391x3
233         Datatype: H5T_IEEE_F64LE (double)
234
235     Dataset 'Point_cloud_xyz_(t=55s) '
236         Size: 21324x3
237         Datatype: H5T_IEEE_F64LE (double)
238
239     Dataset 'Point_cloud_xyz_(t=5s) '
240         Size: 20467x3
241         Datatype: H5T_IEEE_F64LE (double)
242
243     Dataset 'Point_cloud_xyz_(t=600s) '
244         Size: 19835x3
245         Datatype: H5T_IEEE_F64LE (double)
246
247     Dataset 'Point_cloud_xyz_(t=60s) '
248         Size: 20727x3
249         Datatype: H5T_IEEE_F64LE (double)
250
251     Dataset 'Point_cloud_xyz_(t=660s) '
252         Size: 19716x3
253         Datatype: H5T_IEEE_F64LE (double)
254
255     Dataset 'Point_cloud_xyz_(t=70s) '
256         Size: 20173x3
257         Datatype: H5T_IEEE_F64LE (double)
258
259     Dataset 'Point_cloud_xyz_(t=780s) '
260         Size: 20274x3
261         Datatype: H5T_IEEE_F64LE (double)
262
263     Dataset 'Point_cloud_xyz_(t=80s) '
264         Size: 20277x3
265         Datatype: H5T_IEEE_F64LE (double)
266
267     Dataset 'Point_cloud_xyz_(t=900s) '
268         Size: 19527x3
269         Datatype: H5T_IEEE_F64LE (double)
270
271     Dataset 'Point_cloud_xyz_(t=90s) '
272         Size: 21591x3
273         Datatype: H5T_IEEE_F64LE (double)
274
275     Dataset 'Point_cloud_xyz_(t=9s) '
276         Size: 20913x3
277         Datatype: H5T_IEEE_F64LE (double)
278
279     Dataset 't'
280         Size: 47
281         Datatype: H5T_IEEE_F64LE (double)
```
